# Supplementary material
Source: PubMed Central journal article supplement (PMC5651997)

**Supplementary Fig. 1. Differentially expressed genes.** Genes without significant differences in fold change or without significant p-value are represented with black dots. Dots of other colors represent the 675 significantly upregulated and 441 significantly downregulated genes found during RNA-sequencing.

### Volcano plot of differentially expressed genes due to atrazine exposure

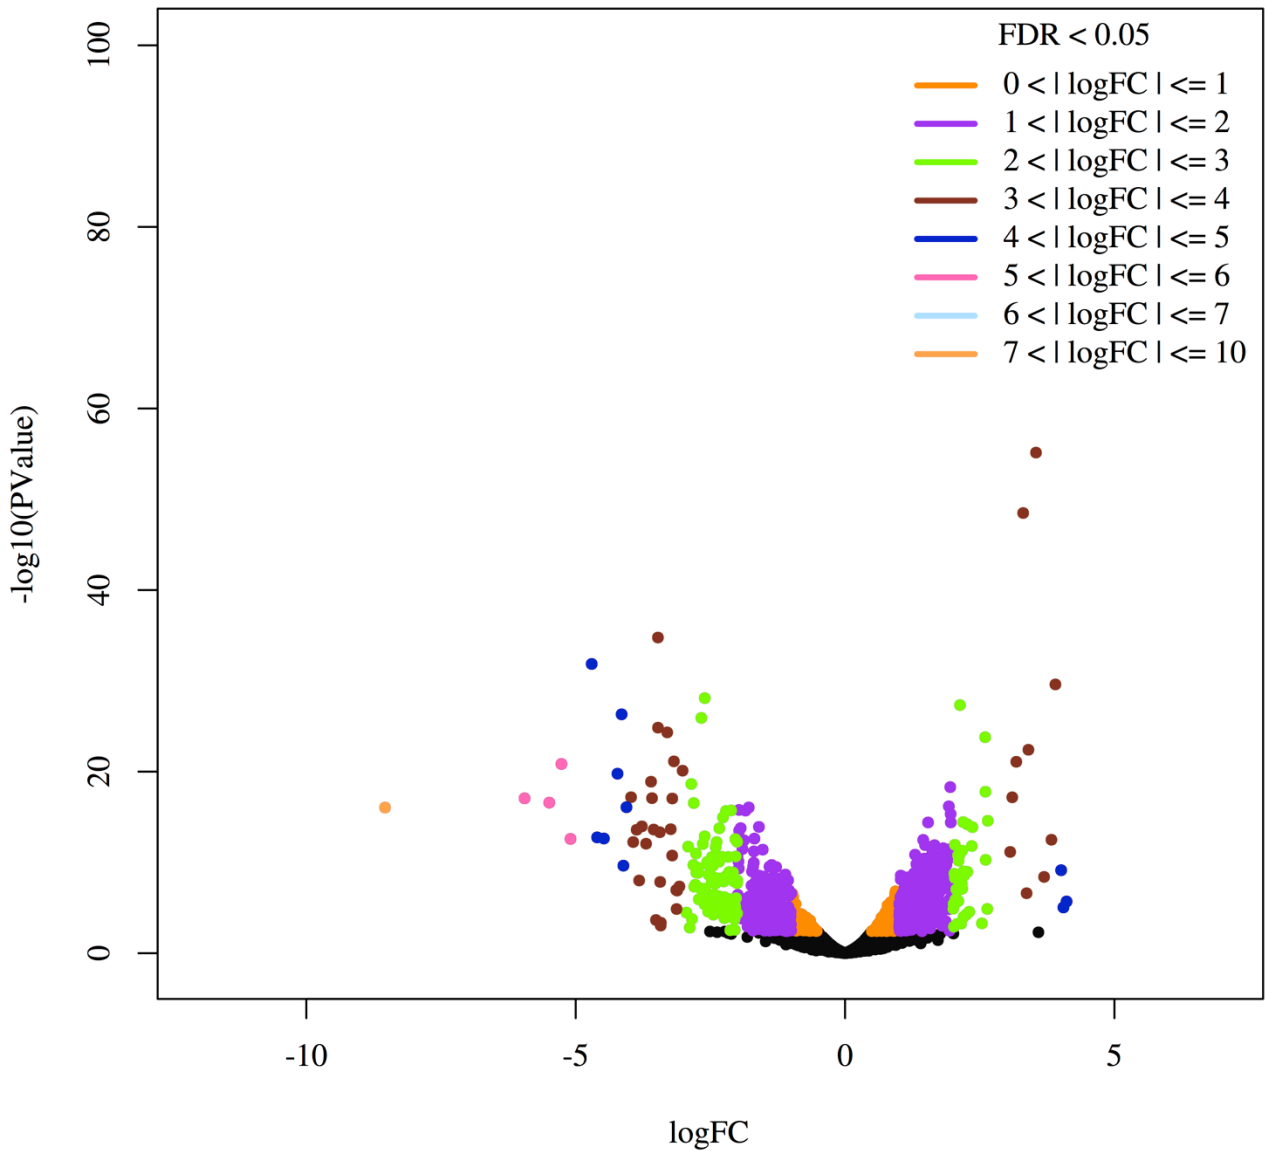

**Supplementary Fig. 2. Individual toxicity of six environmentally relevant chemicals.** *D. magna* neonates were exposed to varying concentrations of each compound individually for 48 hours, and survival was measured.

### Transform of Combined of individual chemicals

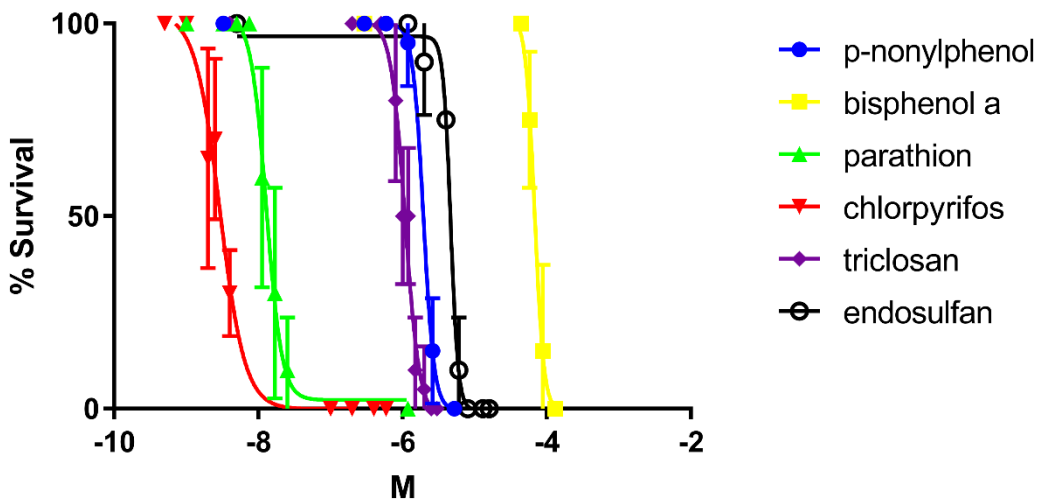

**Supplementary Fig. 3. Area under the curve (AUC) for individual chemicals, atrazine containing mixtures, and CATAM predictive dose-response curves.** AUC was calculated for each chemical's individual dose-response, atrazine mixture, and CATAM dose-response curve using Graphpad Prism 7.0. The CATAM model's AUC was calculated based on the upper and lower limits of the 95% CI from the LC50 and Hillslope's used to determine the dose-response curve of the model as described in the Materials and Methods. AUCs were compared using one-way ANOVA followed by Fisher's LSD test. Bars that are significantly different have different letters. Asterisks denote p-values for comparison to the CATAM model: \* =  $\leq 0.05$ ; \*\* =  $\leq 0.01$ ; \*\*\* =  $\leq 0.001$ .

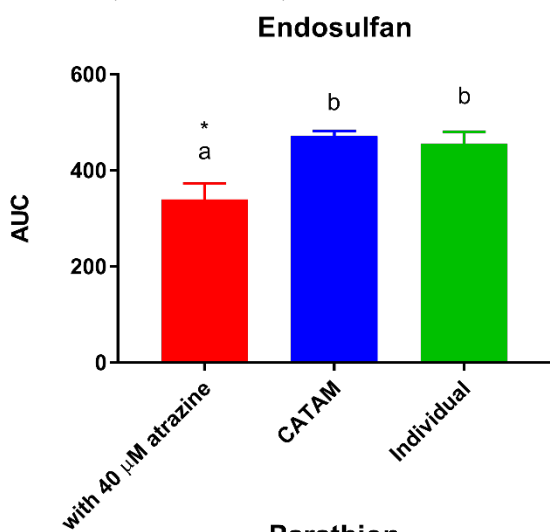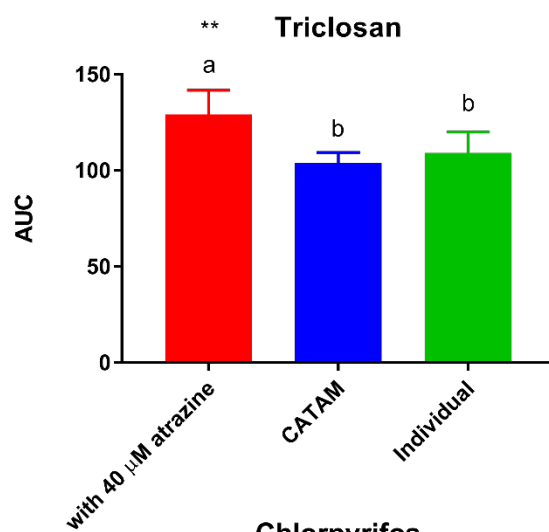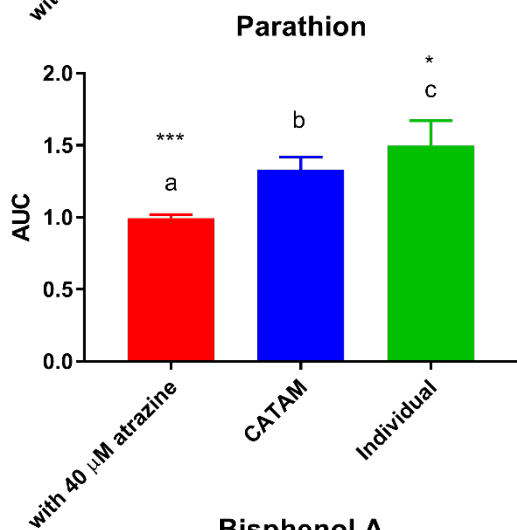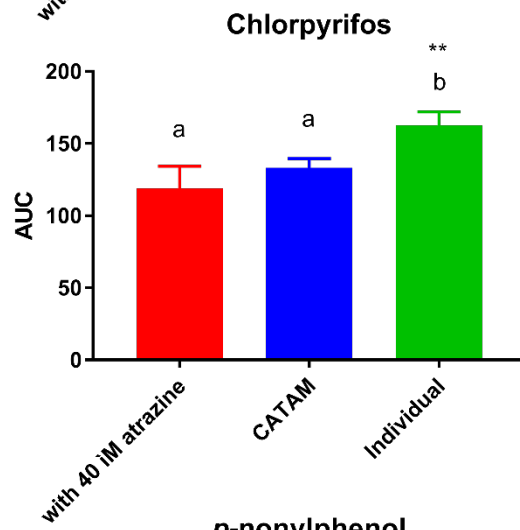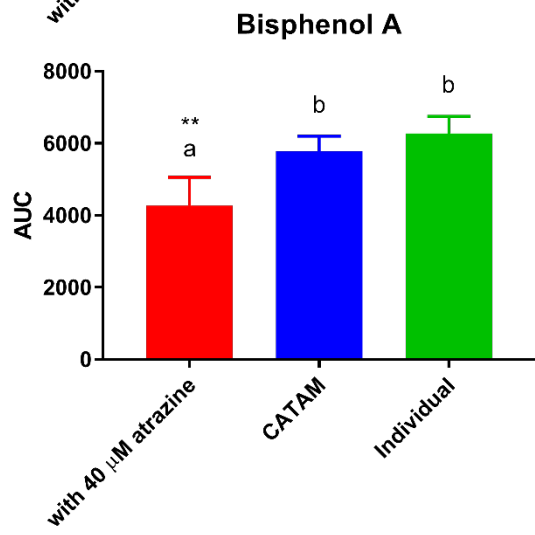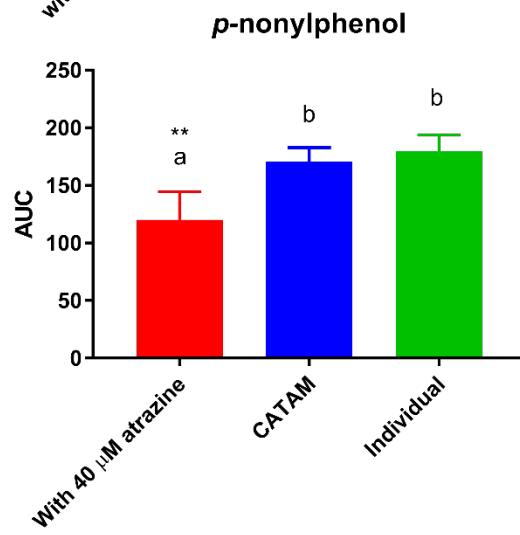

Supplement: NIHMS910032-supplement-5.pdf [file NIHMS910032-supplement-5.pdf]
